# Supplementary material for: How Agroecological Transition Frameworks Are Reshaping Agroecology: A Review
Source: Preprints.org preprint supplement (doi:10.20944/preprints202409.1926.v1), 2024-09-25
Supplement: Supplementary file 1 [file supplementary]

**Supplementary Material – Appendix B – Most co-cited authors and papers until the 10th occurrence**

| **Cluster** | **Author** | **Title** |
| --- | --- | --- |
|  | francis c, 2003 | Agroecology: The Ecology of Food Systems |
|  | wezel a, 2009 | Agroecology as a science, a movement and a practice. A review |
|  | geels fw, 2002 | Technological transitions as evolutionary reconfiguration processes: a multi-level perspective and a case-study |
|  | gliessman s, 2016 | Transforming food systems with agroecology |
|  | hill sb, 1995 | Conceptual Framework for the Transition from Conventional to Sustainable Agriculture |
|  | lamine c, 2011 | Transition pathways towards a robust ecologization of agriculture and the need for system redesign. Cases from organic farming and IPM |
|  | wezel a, 2016 | Agroecology territories: places for sustainable agricultural and food systems and biodiversity conservation |
|  | chantre e, 2014 | Trajectories of French Field Crop Farmers Moving Toward Sustainable Farming Practices: Change, Learning, and Links with the Advisory Services |
| Transition theory  (red color cluster) | geels fw, 2004 | From sectoral systems of innovation to socio-technical systems: Insights about dynamics and change from sociology and institutional theory |
|  | geels fw, 2007 | Typology of sociotechnical transition pathways |
|  | ollivier g, 2018 | Agroecological Transitions: What Can Sustainability Transition Frameworks |
|  | blesh j, 2014 | Transitions to agroecological farming systems in the Mississippi River Basin: toward an integrated socioecological analysis |
|  | bui s, 2016 | Sustainability transitions: Insights on processes of niche-regime interaction and regime reconfiguration in agri-food systems |
|  | geels fw, 2011 | The multi-level perspective on sustainability transitions: Responses to seven criticisms |
|  | gliessman sr, 2007 | Agroecology: The ecology of sustainable food systems |
|  | magrini mb, 2016 | Why are grain-legumes rarely present in cropping systems despite their envi |
|  | klerkx l., 2012 | Evolution of systems approaches to agricultural innovation: concepts, analysis and interventions |
|  | prost l, 2017 | Innovative design for agriculture in the move towards sustainability: scientific challenges |
|  | vanloqueren g, 2009 | How agricultural research systems shape a technological regime that develops genetic engineering but locks out agroecological innovations |
|  | duru m, 2015 | How to implement biodiversity-based agriculture to enhance ecosystem services: a review |
|  | wezel a, 2014 | Agroecological practices for sustainable agriculture. A review |
|  | alteri ma, 2002 | Agroecology: the science of natural resource management for poor farmers in marginal environments |
|  | altieri ma, 2018 | Agroecology: the science of sustainable agriculture |
|  | caron p, 2014 | Making transition towards ecological intensification of agriculture a reality: the gaps in and the role of scientific knowledge |
| Techniques and practices  (yellow color cluster9 | altieri ma, 2012 | Agroecologically efficient agricultural systems for smallholder farmers: contributions to food sovereignty |
|  | bonaudo t, 2014 | Agroecological principles for the redesign of integrated crop–livestock systems |
|  | dumont b, 2013 | Prospects from agroecology and industrial ecology for animal production in the 21st century |
|  | van der ploeg j.d., 2008 | The new peasantries: rural development in times of globalization |
|  | zhang w, 2007 | L'agriculture écologiquement intensive: nature et défis |
|  | kremen c, 2012 | Diversified farming systems: an agroecological, systems-based alternative to modern industrial agriculture |
|  | altieri ma, 2011 | The agroecological revolution in Latin America: rescuing nature, ensuring food sovereignty and empowering peasants |
|  | wezel a, 2011 | [Agroecology as a Science, a Movement and a Practice](https://link.springer.com/chapter/10.1007/978-94-007-0394-0_3) |
|  | levidow l, 2014 | Agroecological research: conforming—or transforming the dominant agro-food regime? |
|  | cacho mmyt, 2018 | Bringing agroecology to scale: Key drivers and emblematic cases |
|  | de molina mg, 2013 | Agroecology and politics. How to get sustainability? About the necessity for a political agroecology |
| Political and social  (blue color cluster) | méndez ve, 2013 | Agroecology as a transdisciplinary, participatory, and action-oriented approach |
|  | rosset pm, 2011 | The Campesino-to-Campesino agroecology movement of ANAP in Cuba: social process methodology in the construction of sustainable peasant agriculture and food sovereignty |
|  | giraldo of, 2018 | Agroecology as a territory in dispute: Between institutionality and social movements |
|  | méndez ve, 2017 | Integrating agroecology and participatory action research (PAR): Lessons from Central America |
|  | holt-giménez e, 2013 | Agroecology, food sovereignty, and the new green revolution |
|  | rosset pm, 2012 | Rural Social Movements and Agroecology: Context, Theory, and Process |
|  | nicholls ci, 2018 | Pathways for the amplification of agroecology |
|  | wezel a, 2020 | Agroecological principles and elements and their implications for transitioning to sustainable food systems. A review |
|  | fao, 2018 | The 10 Elements of Agroecology Guiding the Transition to Sustainable Food and Agricultural Systems |
|  | anderson cr, 2019 | From transition to domains of transformation: Getting to sustainable and just food systems through agroecology |
|  | tittonell p, 2014 | Ecological intensification of agriculture—sustainable by nature |
|  | gliessman sr, 2014 | Agroecology and Social Transformation |
|  | barrios e, 2020 | The 10 Elements of Agroecology: enabling transitions towards sustainable agriculture and food systems through visual narratives |
| Transition criteria  (green color cluster) | hlpe, 2019 | Agroecological and other innovative approaches for sustainable agriculture and food systems that enhance food security and nutrition. A report by the High Level Panel of Experts on Food Security and Nutrition of the Committee on World Food Security, Rome |
|  | timmermann c, 2015 | Agroecology as a vehicle for contributive justice |
|  | fao, 2019 | TAPE Tool for Agroecology Performance Evaluation 2019 – Process of development and guidelines for application |
|  | mottet a, 2020 | Assessing transitions to sustainable agricultural and food systems: a tool for agroecology performance evaluation (TAPE) |
|  | teixeira hm, 2018 | Understanding farm diversity to promote agroecological transitions |
|  | tittonell p, 2020 | Assessing resilience and adaptability in agroecological transitions |
|  | van der ploeg jd, 2019 | The economic potential of agroecology: Empirical evidence from Europe |
|  | seufert v, 2012 | Comparing the yields of organic and conventional agriculture |
